# Supplementary material
Source: ML conference proceedings conference paper supplement (https://openreview.net/forum?id=aD7zl8MRHV)

# Performance with Human Proxy Models

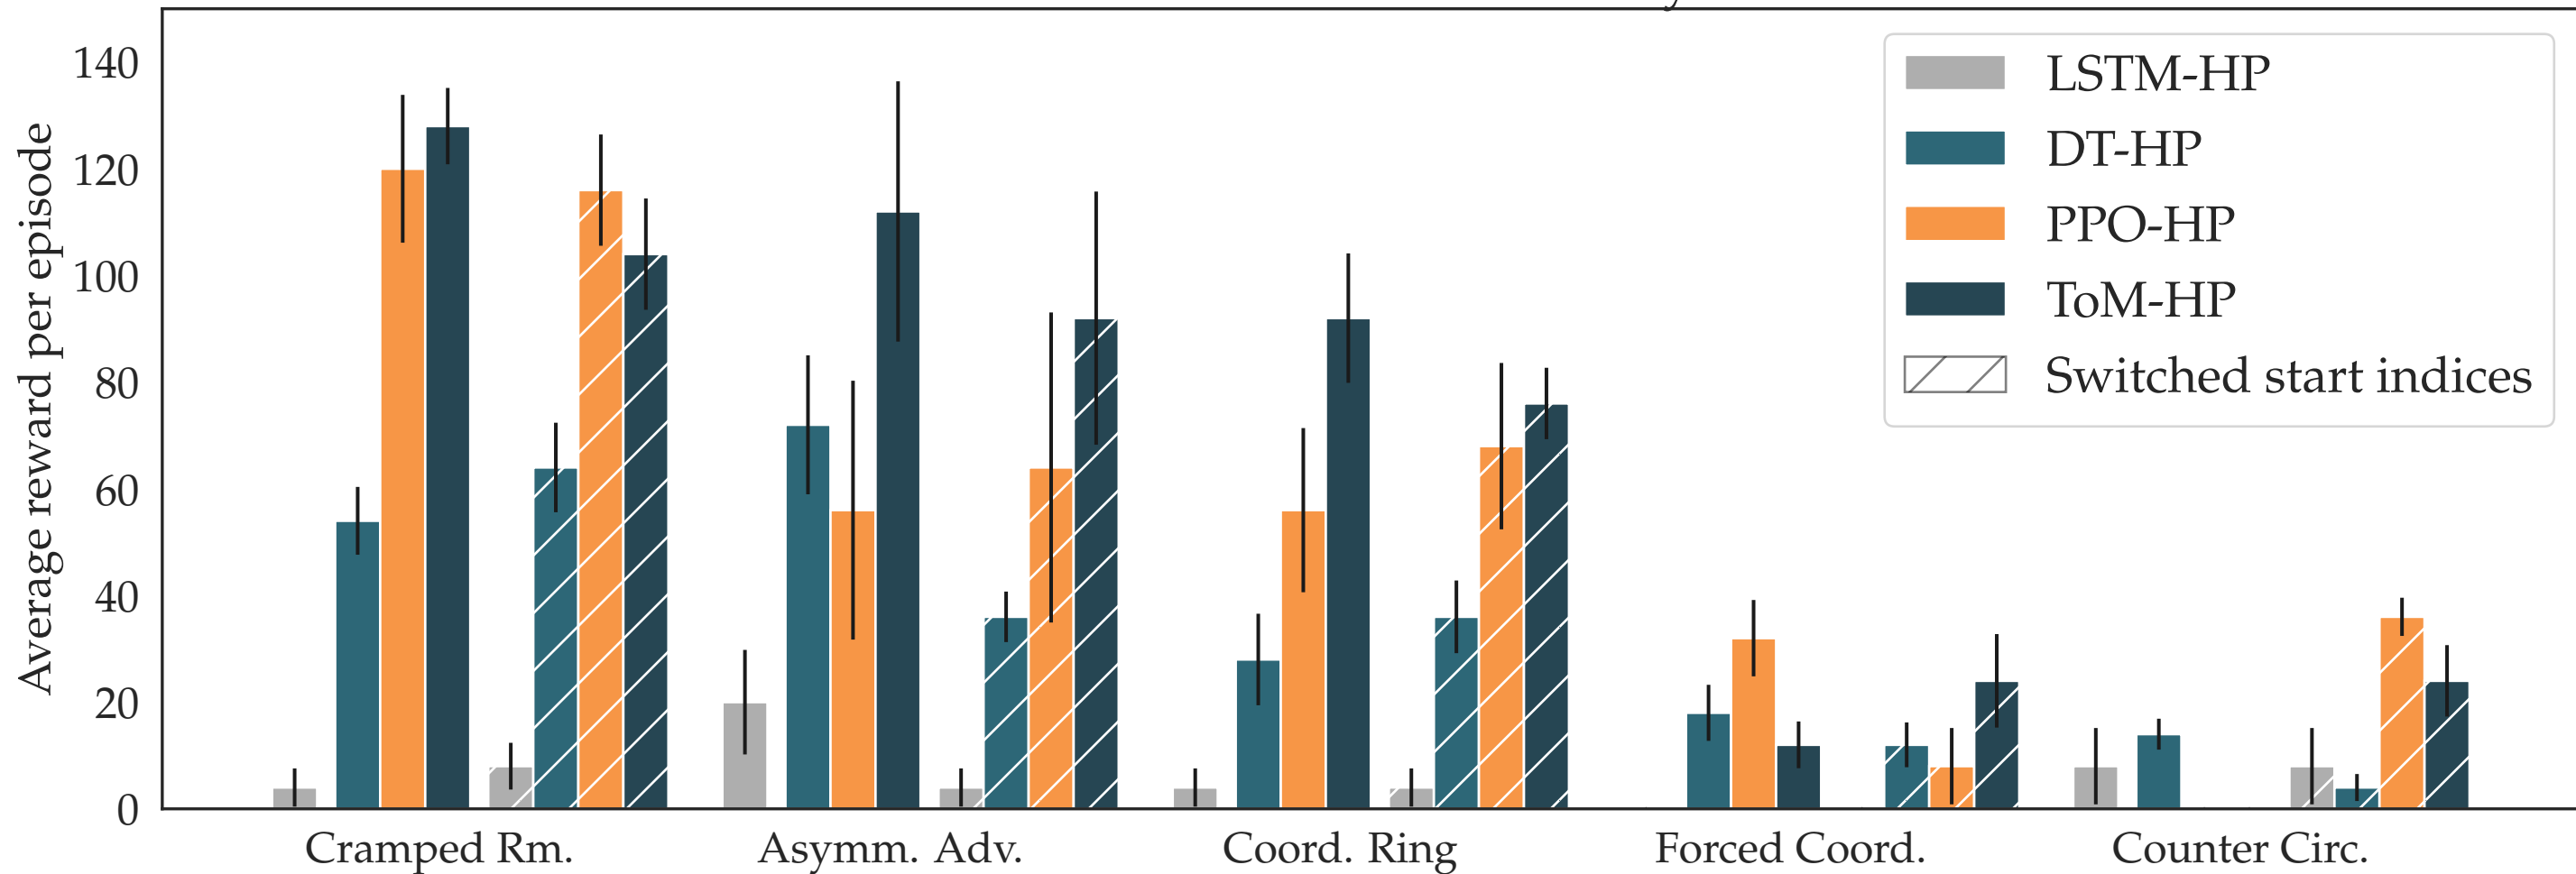

Supplement: supplementary_material [file attachment]

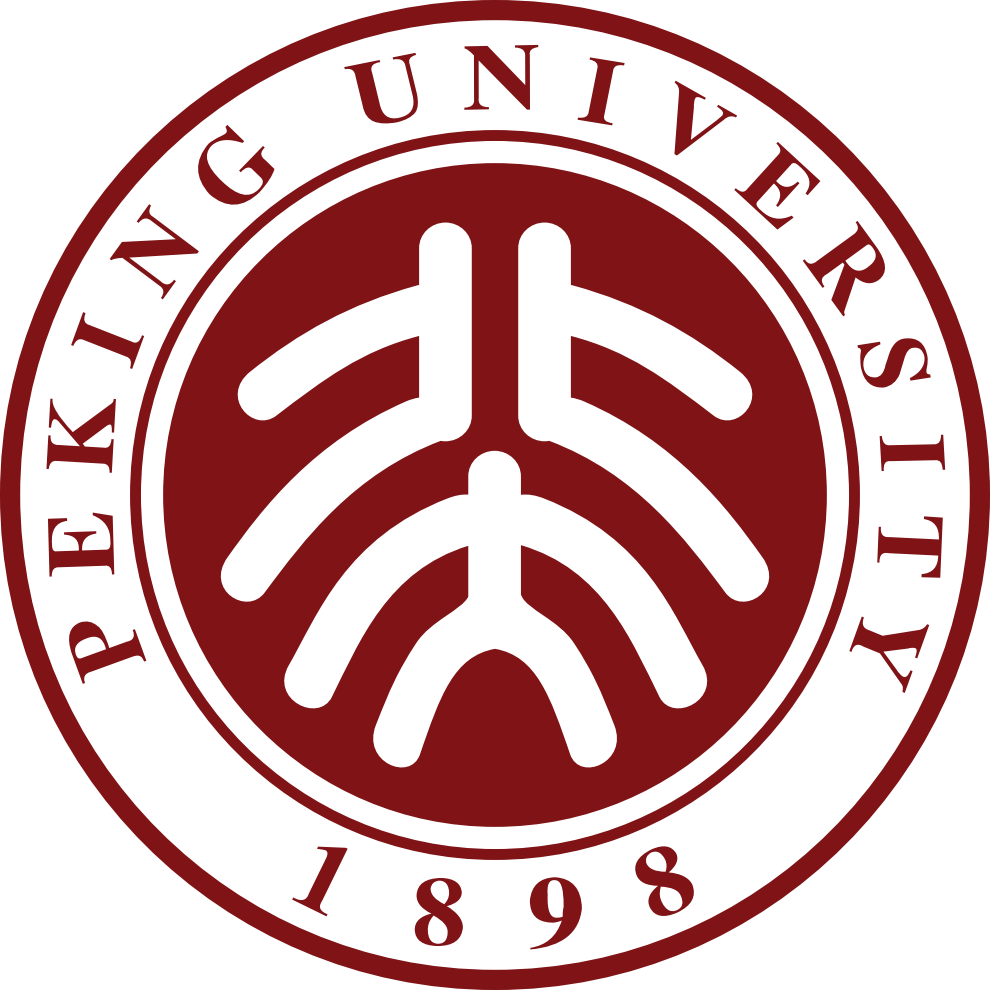

Supplement: supplementary_material [file attachment]

*Decoder*

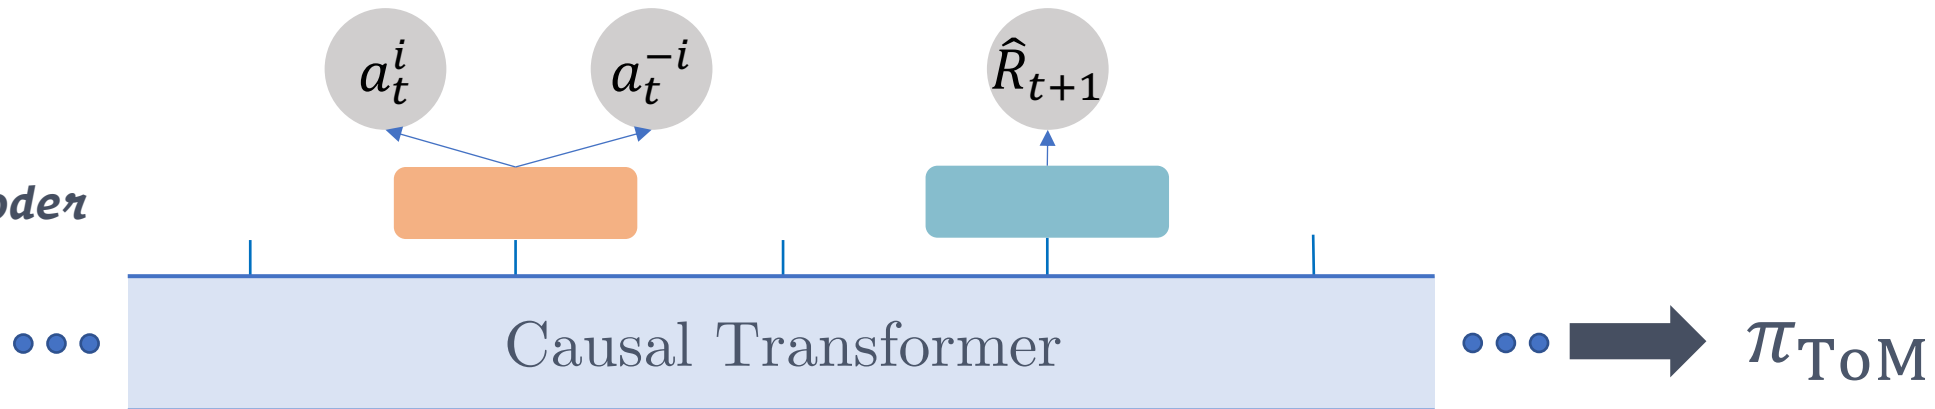

*Encoder*

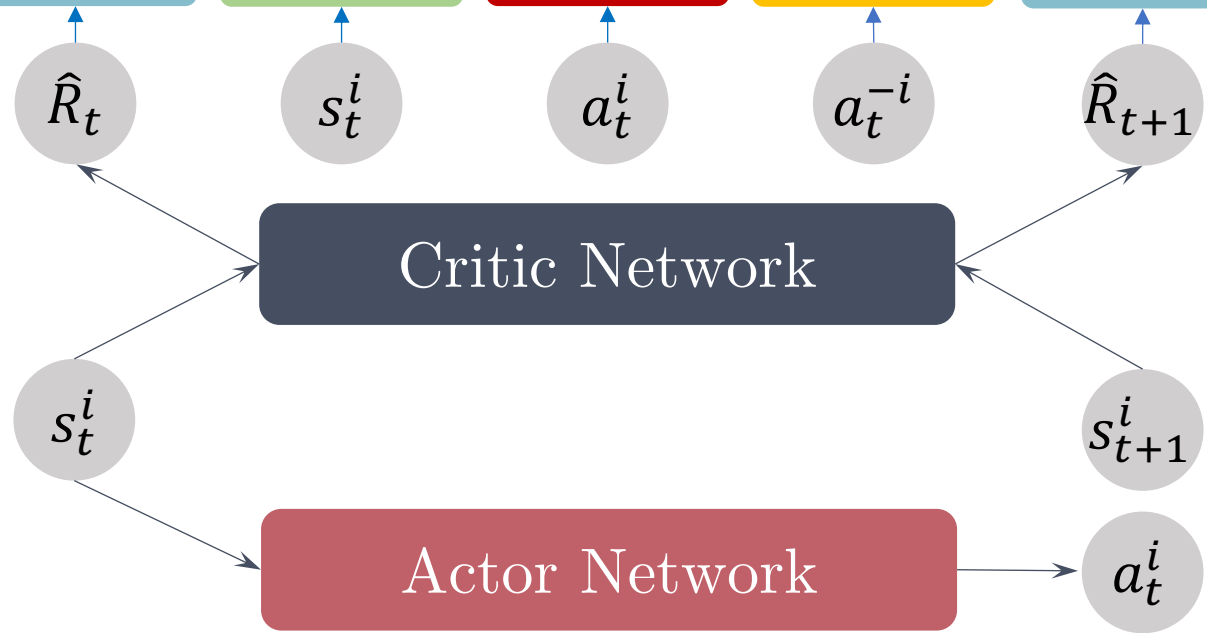

$\pi_{\text{RL}}$

Supplement: supplementary_material [file attachment]

Performance with Human Proxy Models

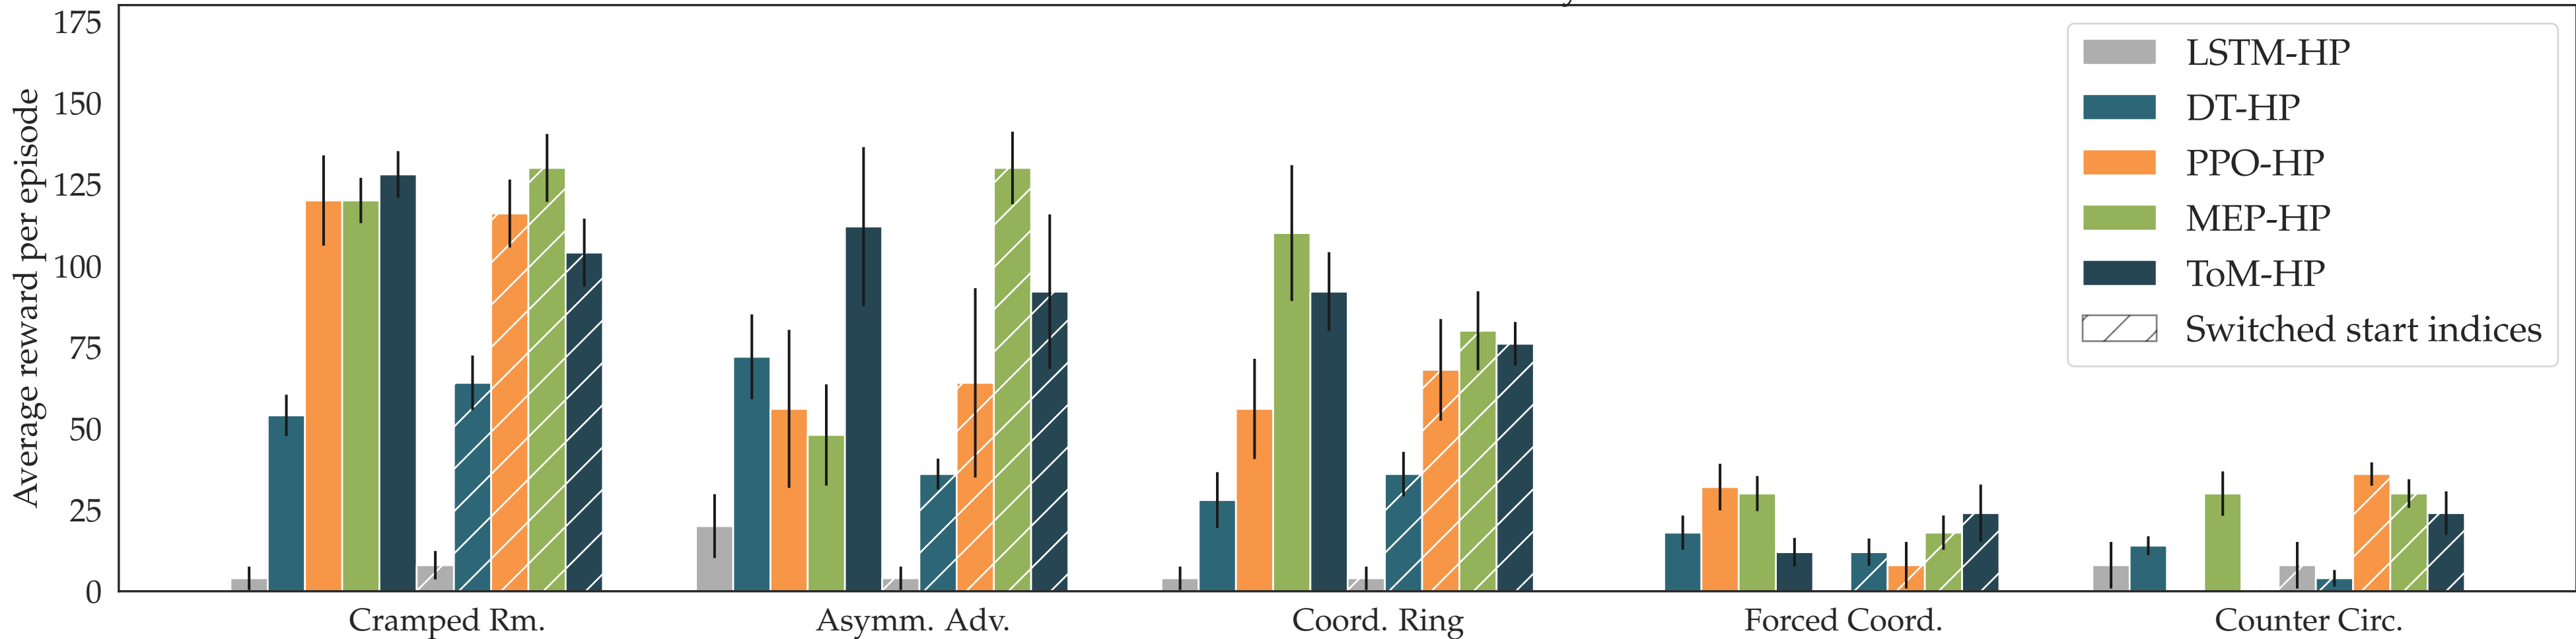

Supplement: supplementary_material [file attachment]

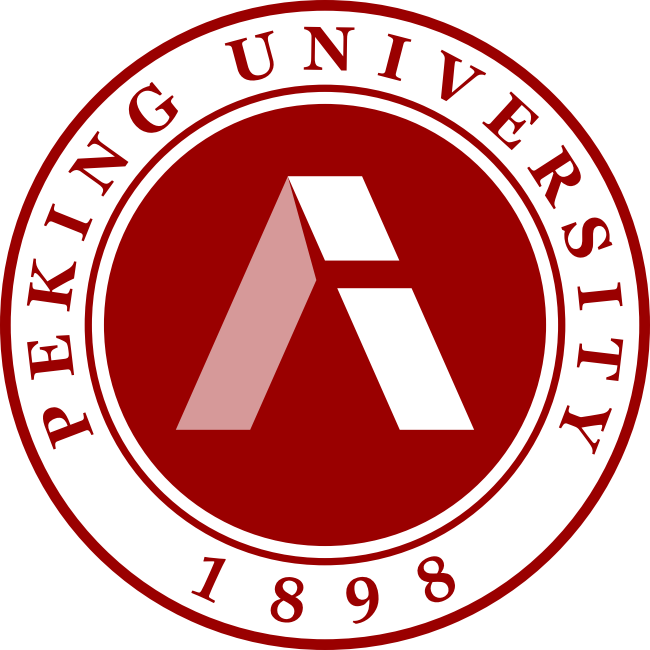

Supplement: supplementary_material [file attachment]

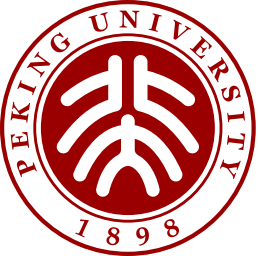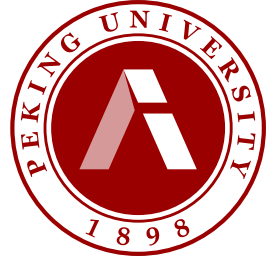

北京大学 人工智能研究院

INSTITUTE FOR ARTIFICIAL INTELLIGENCE, PEKING UNIVERSITY

Supplement: supplementary_material [file attachment]

# Prediction Accuracy with Human Proxy Models

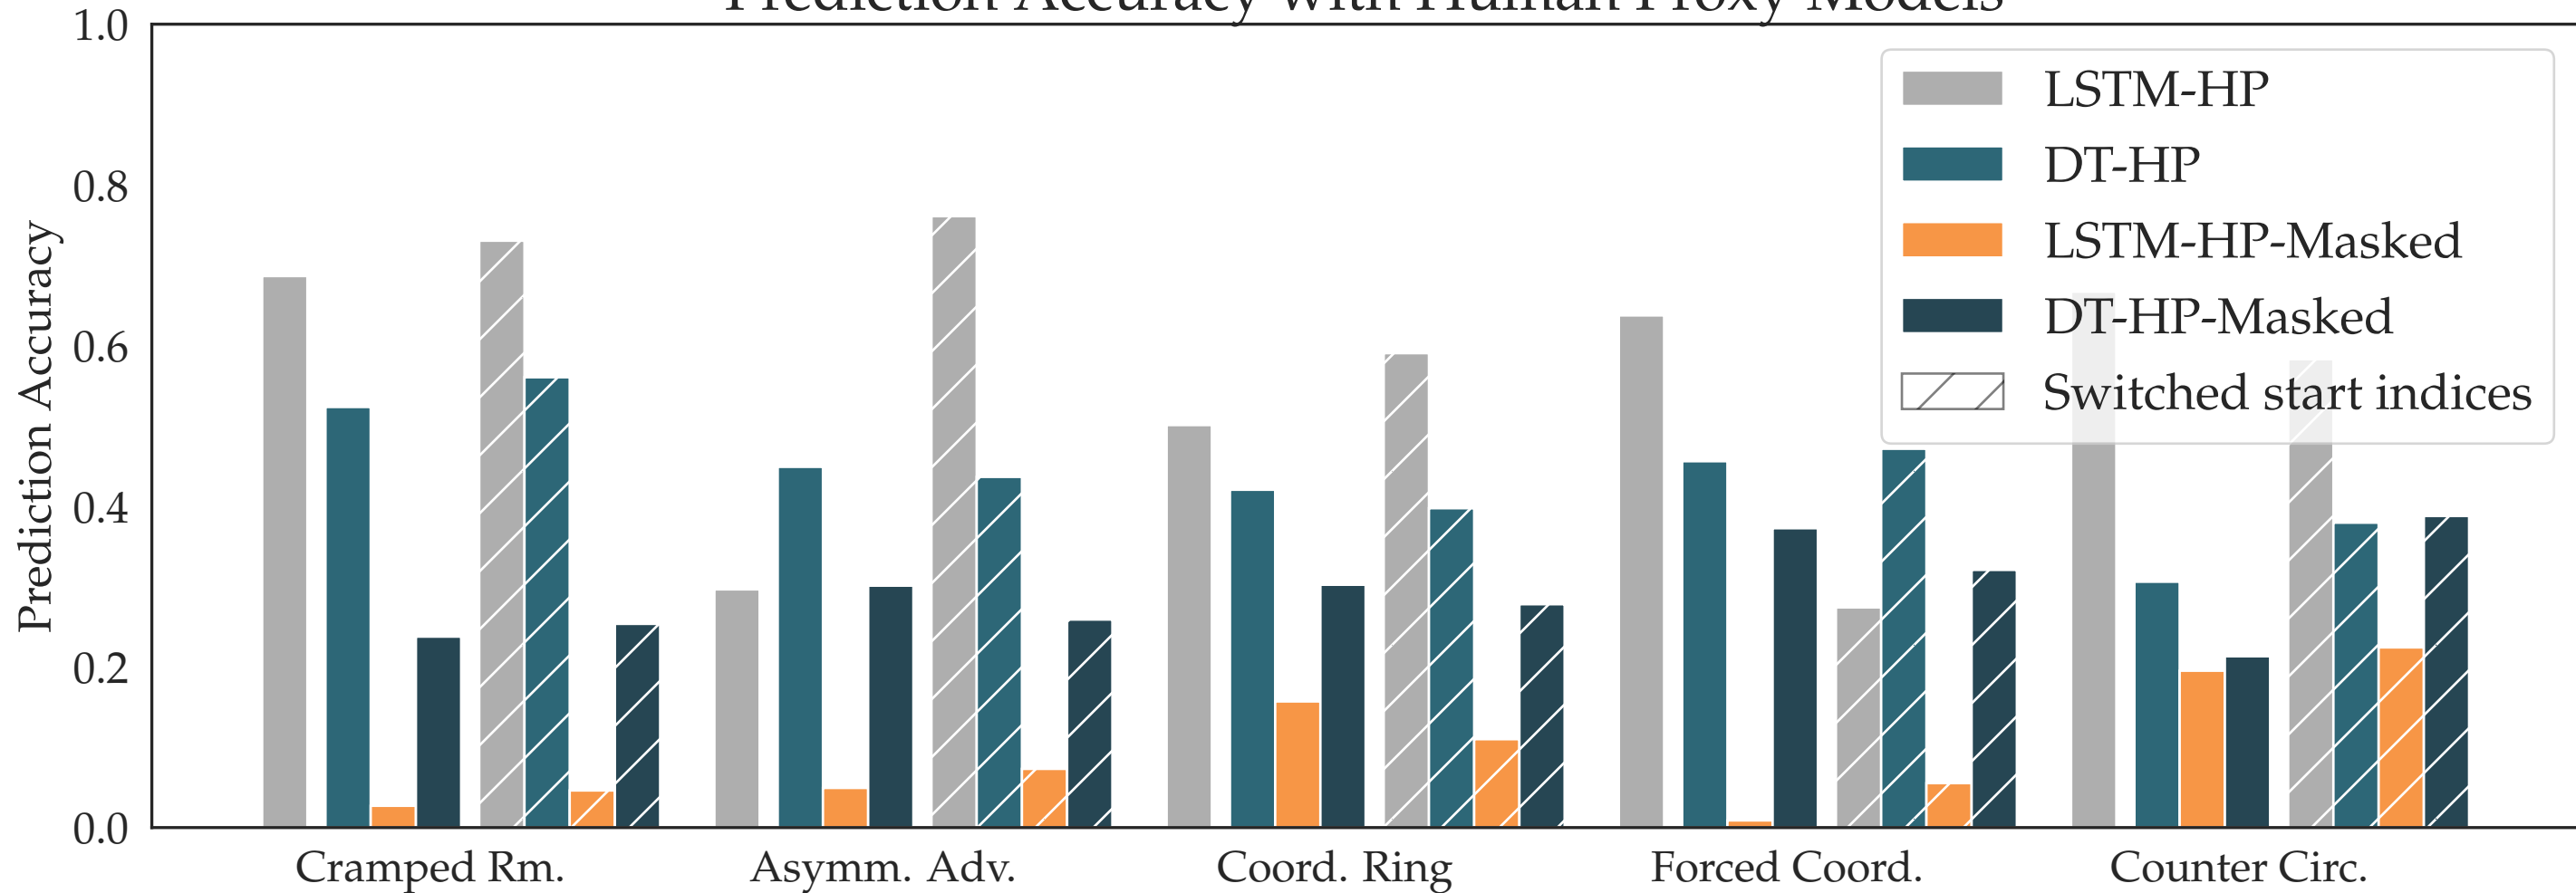

Supplement: supplementary_material [file attachment]
